# Supplementary material for: Streptococcus pneumoniae promotes lung cancer development and progression
Source: PubMed Central journal article supplement (PMC9852931; doi:10.1016/j.isci.2022.105923), 2023-01-04
Supplement: mmc1.pdf [file mmc1.pdf]

**iScience, Volume 26**

**Supplemental information**

**Streptococcus pneumoniae promotes  
lung cancer development and progression**

**Ning Li, Huifen Zhou, Van K. Holden, Janaki Deepak, Pushpa Dhilipkannah, Nevins W. Todd, Sanford A. Stass, and Feng Jiang**

**Table S1.** Spearman correlations between SP abundances in tumor tissue and demographic and clinical characteristics of the NSCLC patients, related to Figure 6.

|               | Age                      | Gender                   | Race                     | Smoking status           | Histological types       | Stage                    |
|---------------|--------------------------|--------------------------|--------------------------|--------------------------|--------------------------|--------------------------|
|               | R <sup>2</sup> (P value) | R <sup>2</sup> (P value) | R <sup>2</sup> (P value) | R <sup>2</sup> (P value) | R <sup>2</sup> (P value) | R <sup>2</sup> (P value) |
| SP abundances | 0.239 (0.367)            | 0.116 (0.327)            | 0.184 (0.154)            | 0.239 (0.538)            | 0.085 (0.546)            | 0.684 (0.026)            |

R<sup>2</sup>: correlation coefficient. The closer the absolute value of R<sup>2</sup> is to 1, the greater the relativity.

**Table S2.** Univariate Cox Proportional Hazards regression analysis of covariates in relation to survival of patients, related to Figure 6.

| Covariate                         | Overall survival |
|-----------------------------------|------------------|
| Age                               | 0.036            |
| Sex                               | 0.6763           |
| Smoking Status                    | 0.148            |
| Tumor histology                   | 0.853            |
| Stage                             | 0.026            |
| Abundance of <i>S. pneumoniae</i> | 0.028            |
| Expression of PAFR                | 0.039            |

The numbers in the table represent P values calculated with the Wald test. P values <0.05 were considered statistically significant.

**Table S3.** Multivariate Cox proportional hazards regression analysis to evaluate the prognostic value of abundance of *S. pneumoniae* and clinical parameters, related to Figure 6.

| Covariate                         | Overall survival |
|-----------------------------------|------------------|
| Age                               | 0.039            |
| Sex                               | 0.564            |
| Smoking Status                    | 0.438            |
| Tumor histology                   | 0.462            |
| Stage                             | 0.029            |
| Abundance of <i>S. pneumoniae</i> | 0.027            |
| Expression of PAFR                | 0.032            |

The numbers in the table represent P values calculated with the Wald test.

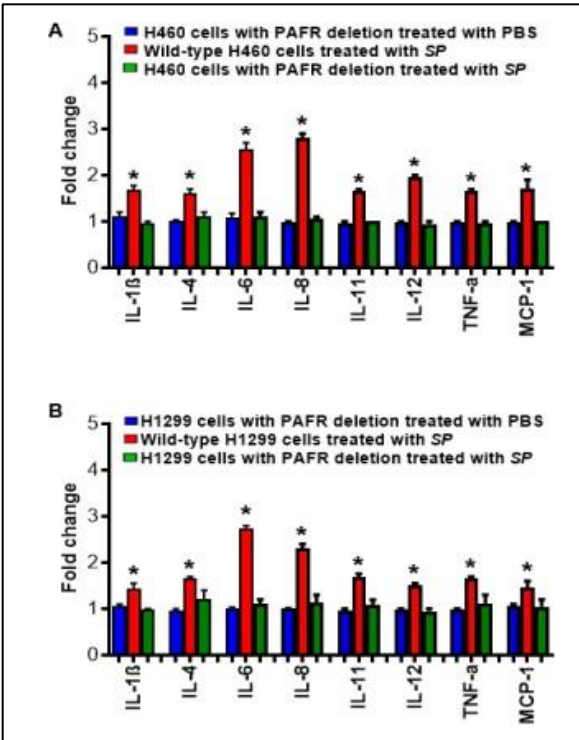

**Figure S1.** PCR array analysis of inflammatory cytokine gene expression in H460 and H1299 cells with deletion of PAFR, related to Figure 3.

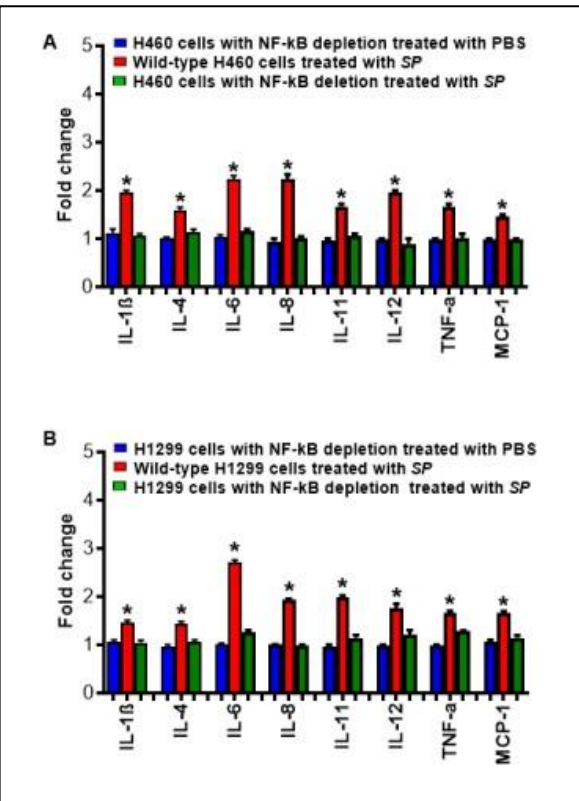

**Figure S2.** SP activated pro-inflammatory cytokines in the H460 and H1299 cells were inhibited by NF-kB depletion, related to Figure 3.

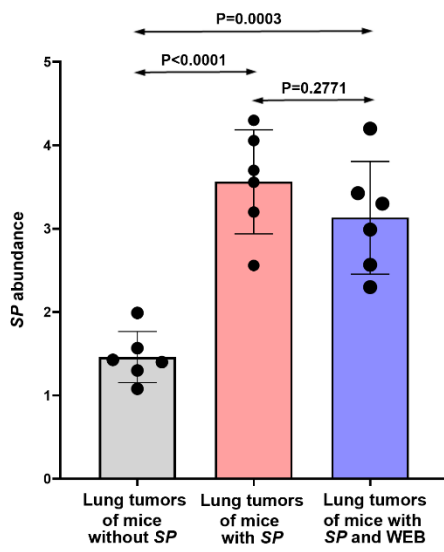

**Figure S3.** ddPCR analysis of *SP* abundance in lung tumors of NNK-mice with or without SP treatments or combined of SP and WEB2086, related to Figure 5.
